# Supplementary material
Source: PubMed Central journal article supplement (PMC2850036)
Supplement: pp.109.149195_2.pdf [file pp.109.149195_2.pdf]

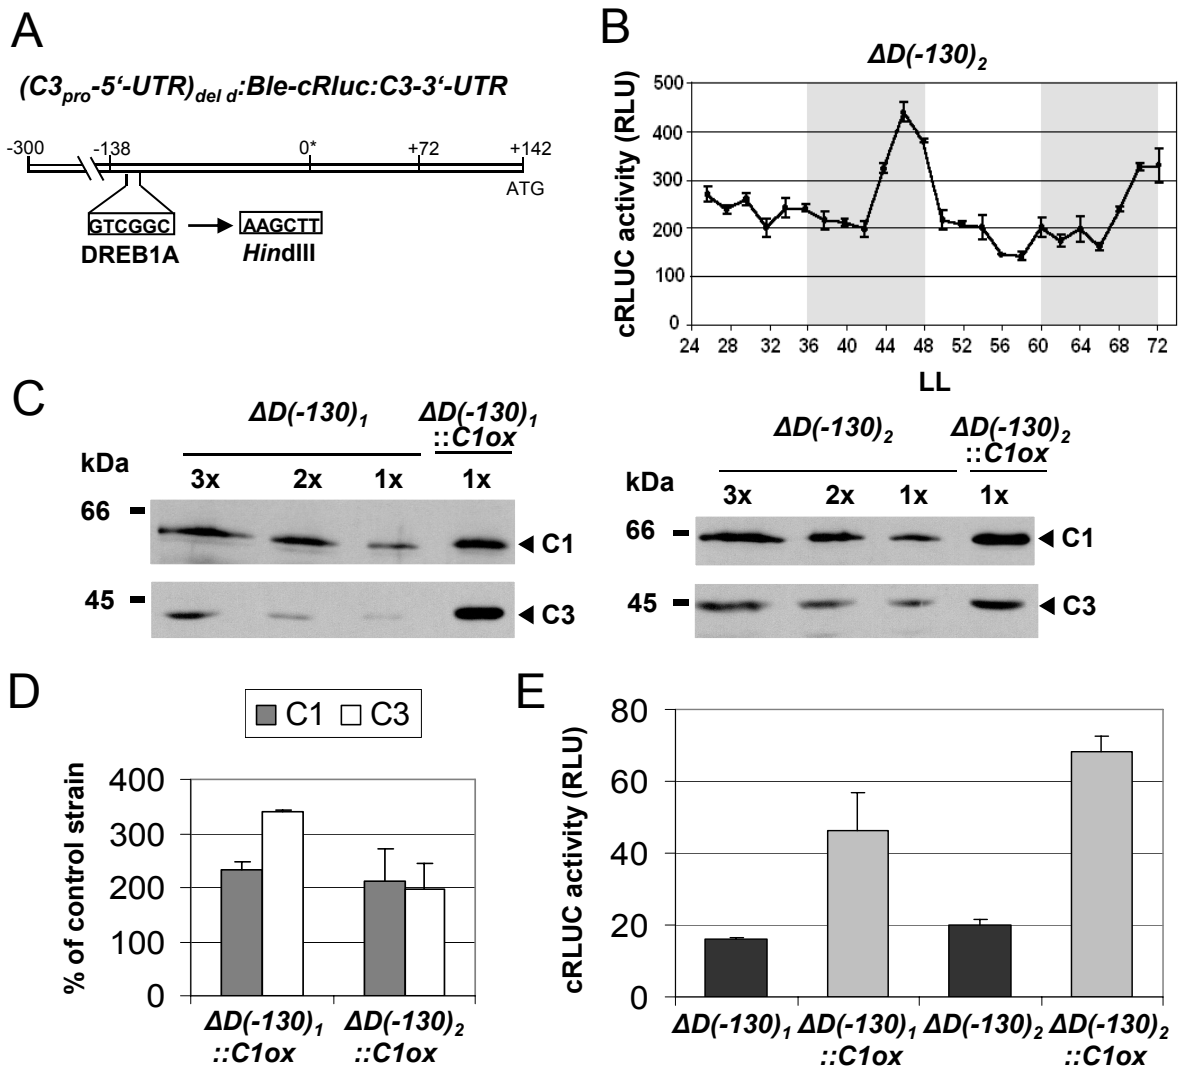

**Supplemental Figure 2.** The Replacement of a DREB1A-Element at -130 of the *C3* Promoter Does Not Influence Circadian *C3* Expression and Co-Regulation of *C3* by *C1*. A, The chimeric construct  $(C3_{pro-5'-UTR})_{del d}::Ble-cRluc:C3-3'-UTR$  of pDI27 having a shortened *C3* promoter and a replaced DREB1A-box at -130 (Voytsekh et al., 2008) that was used for transformation resulting in transgenic *cRluc* lines  $\Delta D(-130)_1$  and  $\Delta D(-130)_2$  is schematically shown. B, The transgenic *cRluc* strain  $\Delta D(-130)_2$  was grown in a 12:12 h light-dark cycle and then released to constant dim light (LL). cRLUC activities in RLU (relative light units; n = 3) were measured at the indicated time-points according to Kiaulehn et al. (2007). C, Different amounts of proteins from a crude extract (90, 60 and 30  $\mu$ g per lane labeled) as 3x, 2x and 1x, respectively, of the *cRluc* strains  $\Delta D(-130)_1$  and  $\Delta D(-130)_2$  that had been transformed in some cases with the *C1ox* vector [ $\Delta D(-130)_1::C1ox$  and  $\Delta D(-130)_2::C1ox$ ] were separated on SDS-PAGE. They were used for immunodetection with anti-*C1* and anti-*C3* antibodies, respectively. D, Quantification of the expression levels of *C1* and *C3* via ImageMaster™2D Elite vs.4.01 (GE Healthcare)

according to Material and Methods in C1ox strains in % in comparison to the appropriate control strain, n = 2. E, Measurements of cRLUC activities in the *cRluc* strains  $\Delta D(-130)_1$  and  $\Delta D(-130)_2$  in comparison to the *cRluc* strains  $\Delta D(-130)_1::C1ox$  and  $\Delta D(-130)_2::C1ox$  in RLU; n = 3. Error bars represent the SEM of technical replicates. Cells were grown at 23°C and used at LD2 to measure the cRLUC activities.
