# Supplementary material
Source: PubMed Central journal article supplement (PMC2850036)
Supplement: pp.109.149195_3.pdf [file pp.109.149195_3.pdf]

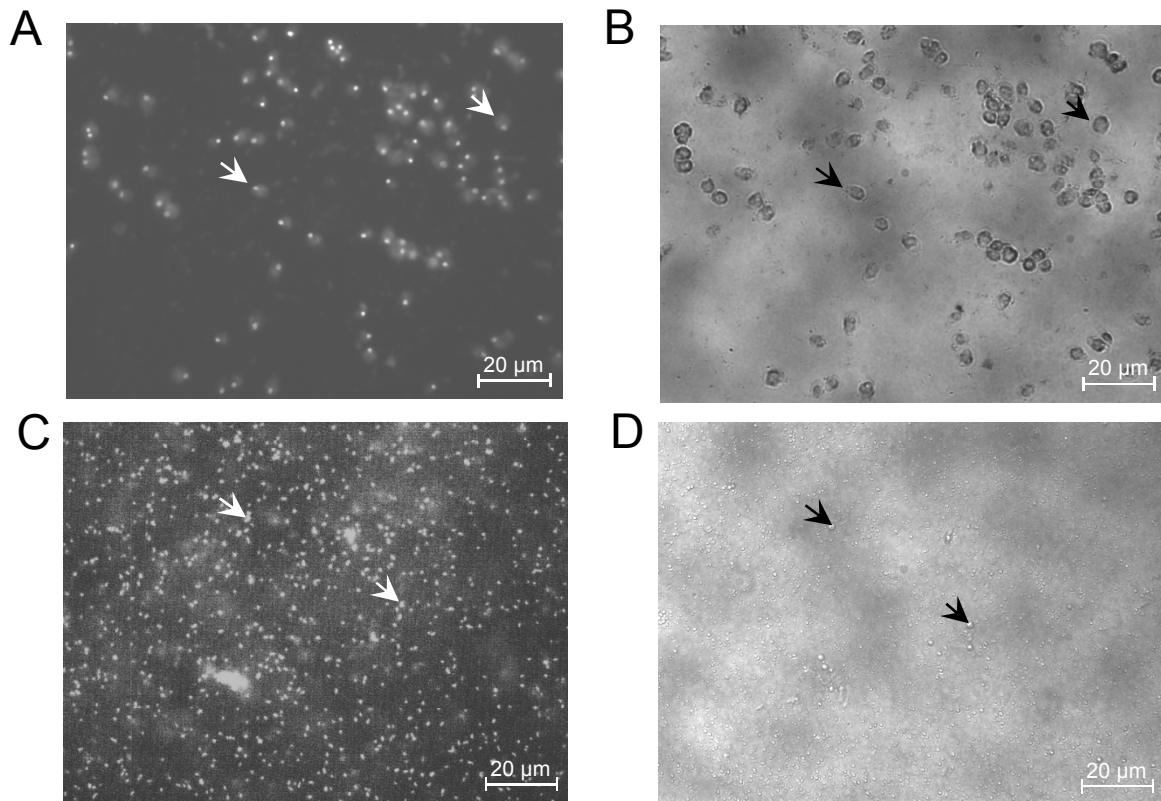

**Supplemental Figure 3.** Fluorescence and Phase-Contrast Microscopy of *Chlamydomonas* Cells and Isolated Nuclei. A-D, Fluorescence (A, C) and phase-contrast microscopy (B, D) of whole cells from *C. reinhardtii* strain SAG83.81 (A, B) or isolated nuclei (C, D) from the final nuclei fraction (see Material and Methods). Fixed cells and nuclei were stained with mithramycin (20  $\mu\text{g}/\mu\text{L}$  in 15 mM  $\text{MgCl}_2$ ) according to Hill and Whatley (1975). Photographs were taken from a ZEISS Axiophot using a 450-490 nm excitation along with a 510 nm beam splitter and a 520 nm barrier filter with 400x magnification.
